# Supplementary material for: Astilbin improves the therapeutic effects of mesenchymal stem cells in AKI-CKD mice by regulating macrophage polarization through PTGS2-mediated pathway
Source: PubMed Central journal article supplement — Stem Cell Res Ther. 2024 Nov 14;15:427. doi: 10.1186/s13287-024-04025-3 (PMC11566621; doi:10.1186/s13287-024-04025-3), 2024-11-14

Full-length blots are presented in here, the samples derive from the same experiment and that blots were processed in parallel

Figure 2D:

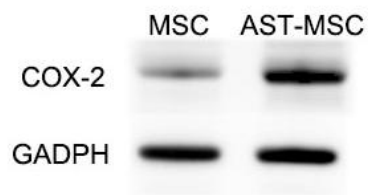

COX-2:

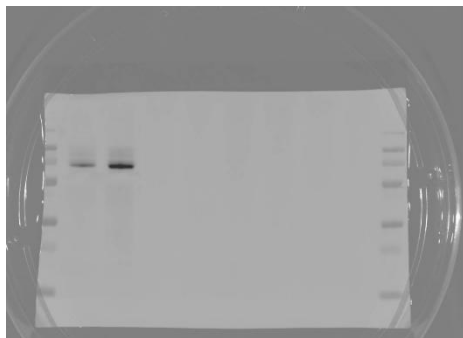

GADPH:

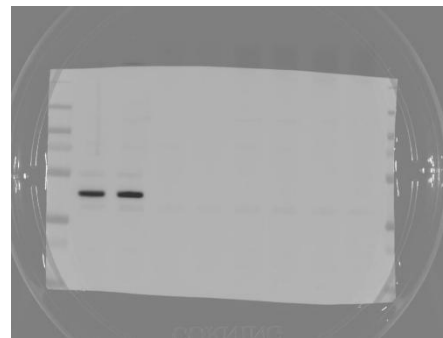

Figure 4A:

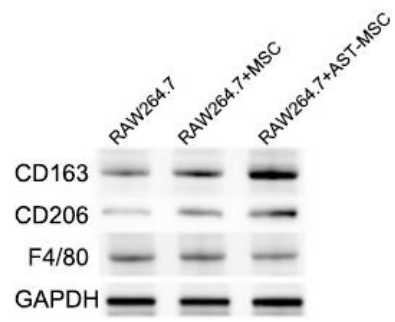

CD163

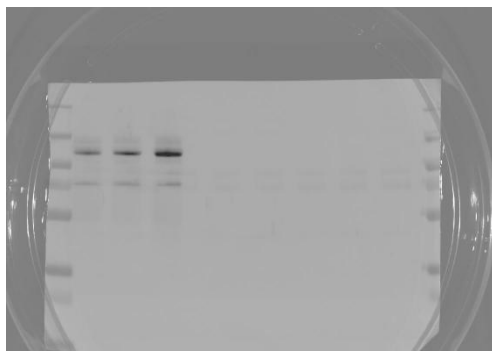

CD206

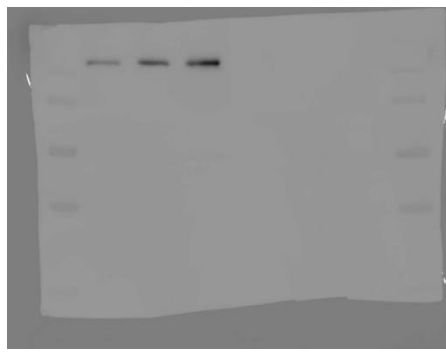

F4/80

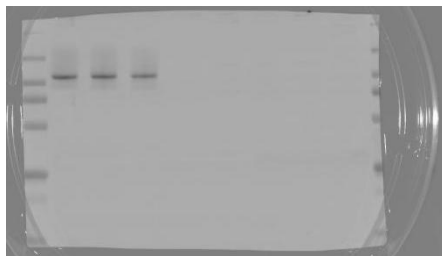

GADPH

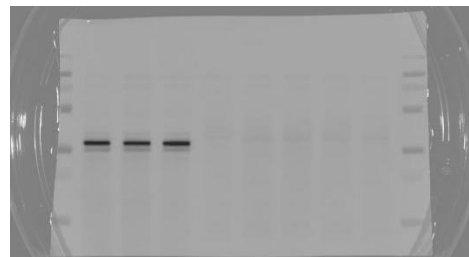

Figure 4H:

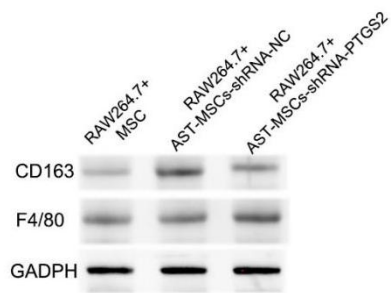

CD163

F4/80

GADPH

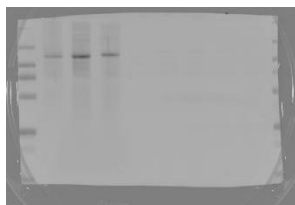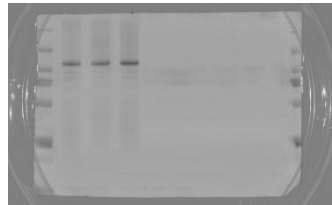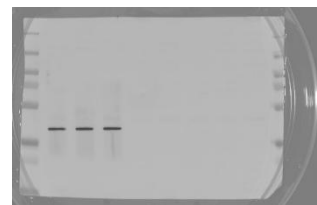

Figure 5L:

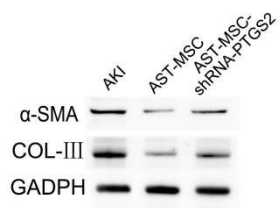

$\alpha$ -SMA

COL-III

GADPH

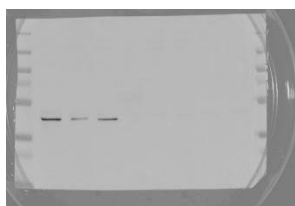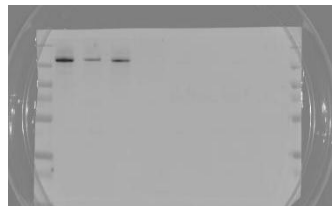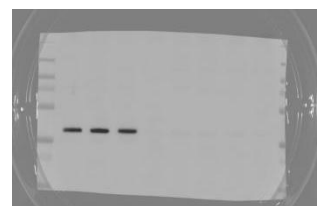

Supplement: 13287_2024_4025_MOESM1_ESM.pdf [file 13287_2024_4025_MOESM1_ESM.pdf]
